# Supplementary material for: Characterization of particulate matter in a multizonal residential apartment: transport, exposure, and mitigation
Source: Royal Society of Chemistry journal article supplement (doi:10.1039/d4ea00080c), 2024-01-01
Supplement: d4ea00080c1.pdf [file d4ea00080c1.pdf]

**-Supplementary information-**

**Characterization of Particulate Matter in Multizonal Residential  
Apartment: Transport, Exposure, and Mitigation**

Alok Kumar Thakur<sup>1</sup>, Sameer Patel<sup>2,3,4\*</sup>

<sup>1</sup>Department of Earth Sciences,  
<sup>2</sup>Department of Civil Engineering  
<sup>3</sup>Department of Chemical Engineering  
<sup>4</sup>Kiran C. Patel Centre for Sustainable Development  
Indian Institute of Technology Gandhinagar  
Palaj, Gandhinagar  
Gujarat 382355 India

Submitted to

Environmental Science: Atmospheres

\*To whom correspondence should be addressed: [sameer.patel@iitgn.ac.in](mailto:sameer.patel@iitgn.ac.in)

## CONTENTS

### Descriptive Text

**Section S1.** Description of instruments, types of food cooked, and sensor location inside the apartment

**Section S2.** Collocation and calibration of the low-cost air quality monitors (LC-AQMs)

### List of Figures

**Figure S1:** Pictures of ACs (air conditioners) installed in (a) living room, (b) BR 1, (c) BR 2, and other tested mitigation measures used during the experimental campaign, (d) PAC (portable air cleaner), and (e) filter sheets

**Figure S2:** Picture of cookstove in the kitchen using piped natural gas for cooking

**Figure S3:** Calibration factor obtained for the nine units of LCAQMs (SID1-SID9) against the 10<sup>th</sup> unit (SID10) used as reference sensor from collocation experiments using incense as PM source

**Figure S4:** Calibration factor obtained for the nine units of LCAQMs (SID1-SID9) against the 10<sup>th</sup> unit (SID10) used as reference sensor from collocation experiments using cooking as PM source

**Figure S5:** Calibration factor obtained for the nine units of LCAQMs (SID1-SID9) against the 10<sup>th</sup> unit (SID10) used as reference sensor from collocation experiments using background PM

**Figure S6:** The left panel shows the particle number size distribution (PNSD), and the right panel shows the particle mass size distribution (PMSD) corresponding to (a, b) deep frying flatbread, and (c, d) frying chips

**Figure S7:** Time for the concentrations in the study room (SR), bedroom 1 (BR 1), and bedroom 2 (BR 2) to reach (a) 2x, (b) 3x, (c) 4x, and (d) peak relative to the background concentration under three scenarios: w/o AC, with AC on, and with AC on + filter sheet, when incense was kept in the worship place

**Figure S8:** Exposure relative to kitchen occurred during incense lighting at two locations in the living room (LR 1 and LR 2), bedroom 1 (BR 1), bedroom 2 (BR 2), and study room (SR)

**Figure S9:** PM<sub>2.5</sub> concentration evolution over 120 minutes in all the zones of the apartment when no PAC was used

**Figure S10:** (a) AC pre-filters attached with additional filter sheet (b) filter sheet before and after AC operation (Before: small square white patch; After: black filter sheets on both the pre-filters)

**Figure S11:** (a) PAC with additional filter sheet on top of it and (b) the filter sheet after use showing PM accumulation in the cross-section area that overlapped with the PAC outlet

### List of Tables

**Table S1:** Different types of food cooked during the experimental campaign and their preparation methodology

**Table S2:** Sensor ID and location of the sensors inside the residential apartment

**Table S3:** Size-resolved average PM concentrations ( $\mu\text{g}/\text{m}^3$ ) for different types of food cooked during the study period

**Section S1.** Description of instruments, types of food cooked, and sensor location inside the apartment

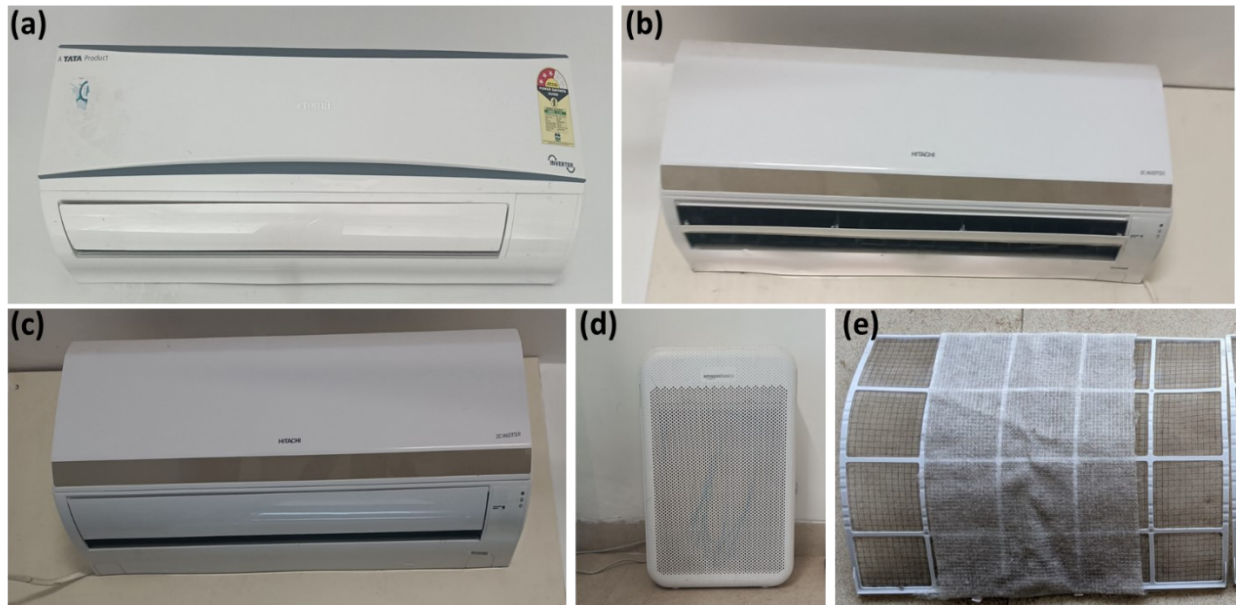

**Figure S1:** Pictures of ACs (air conditioners) installed in (a) living room, (b) BR 1, (c) BR 2, and other tested mitigation measures used during the experimental campaign, (d) PAC (portable air cleaner), and (e) filter sheets

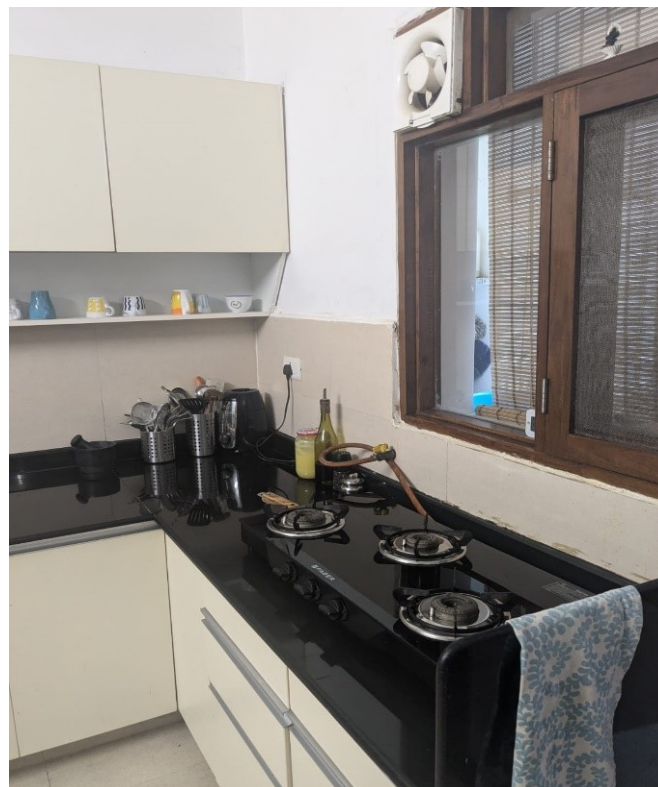

**Figure S2:** Picture of cookstove in the kitchen using piped natural gas for cooking

**Table S1:** Different types of food cooked during the experimental campaign and their preparation methodology

| <b>Food</b>                        | <b>Cooking Methodology</b>                    |
|------------------------------------|-----------------------------------------------|
| Vegetable stir-fry                 | Stir-fried in oil                             |
| Utappam (pancakes with vegetables) | Shallow frying                                |
| Chickpea curry                     | Stir fry followed by boiling.                 |
| Idli (steamed rice cake)           | Steaming                                      |
| Scrambled eggs and chapati         | Stir-fry and baking on stove-top iron pan     |
| Scrambled cheese                   | Stir-fried in oil                             |
| Beans + shallow fry cheese         | Shallow fried in stove-top pan                |
| Paratha (Shallow-fried flatbread)  | Shallow fried flatbread on stove-top iron pan |
| Bhature (Deep fried flatbread)     | Deep fried flatbread in wok                   |
| Chips                              | Deep frying in oil                            |
| Roasting peanuts                   | Roasting on stove-top pan                     |
| Tempered vegetables                | Oil tempering followed by slow cooking        |

**Table S2:** Sensor ID and location of the sensors inside the residential apartment

| <b>Specifics</b> | <b>Location</b>  | <b>Sensor ID (SID)</b> |
|------------------|------------------|------------------------|
| Kitchen 1        | Kitchen platform | SID9                   |
| Kitchen 2        | Refrigerator top | SID4                   |
| LR 1             | Dining Table     | SID2                   |
| LR 2             | TV Stand         | SID10                  |
| LR 3             | Near sofa        | SID1                   |
| BR 1             | Master Bedroom   | SID8                   |
| BR 2             | Guest Bedroom    | SID6                   |
| SR               | Study room       | SID5                   |
| Balcony 1        | Small balcony    | SID3                   |
| Balcony 2        | Large balcony    | SID7                   |

## Section S2. Collocation and calibration of the low-cost air quality monitors (LC-AQMs)

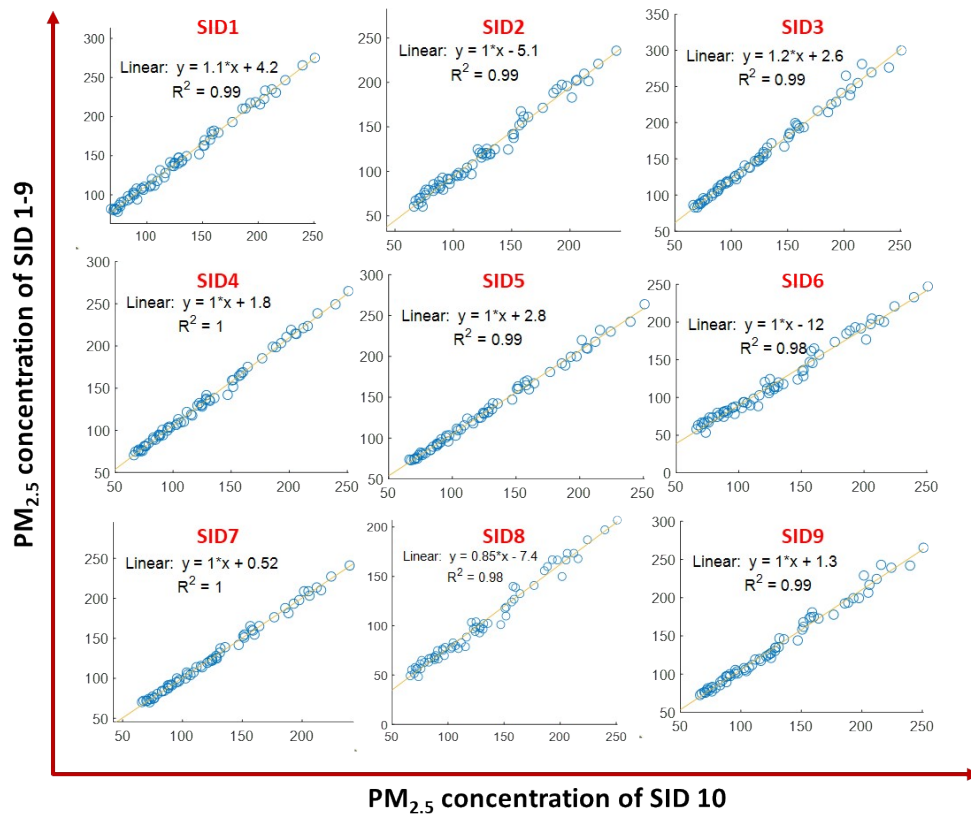

**Figure S3:** Calibration factor obtained for the nine units of LCAQMs (SID1-SID9) against the 10<sup>th</sup> unit (SID10) used as reference sensor from collocation experiments using incense as PM source

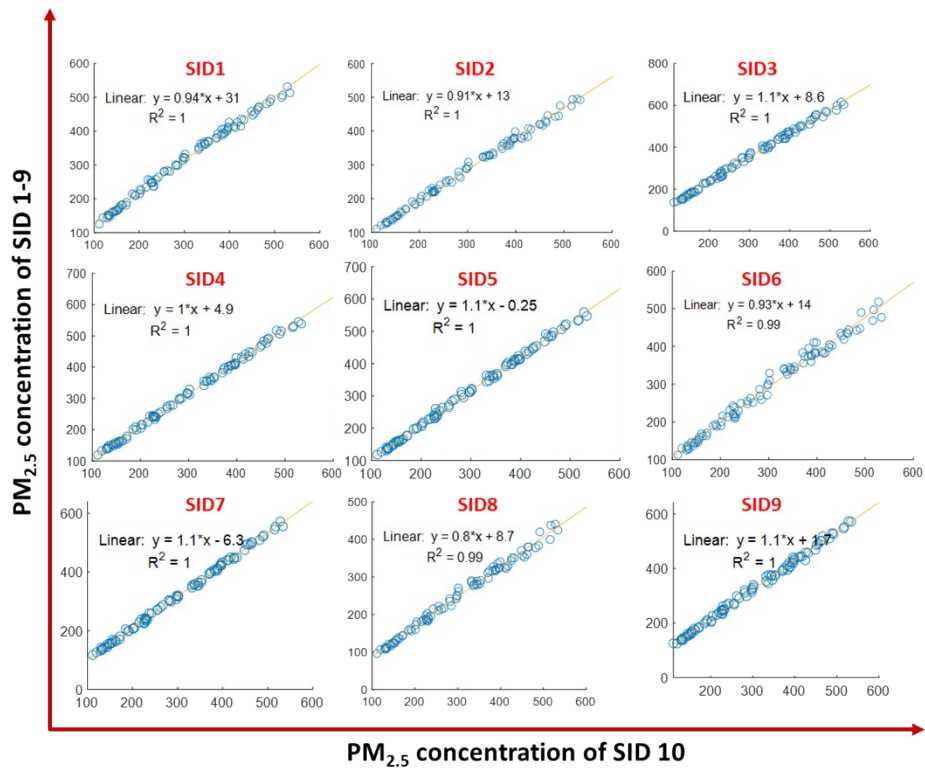

**Figure S4:** Calibration factor obtained for the nine units of LCAQMs (SID1-SID9) against the 10<sup>th</sup> unit (SID10) used as reference sensor from collocation experiments using cooking as PM source

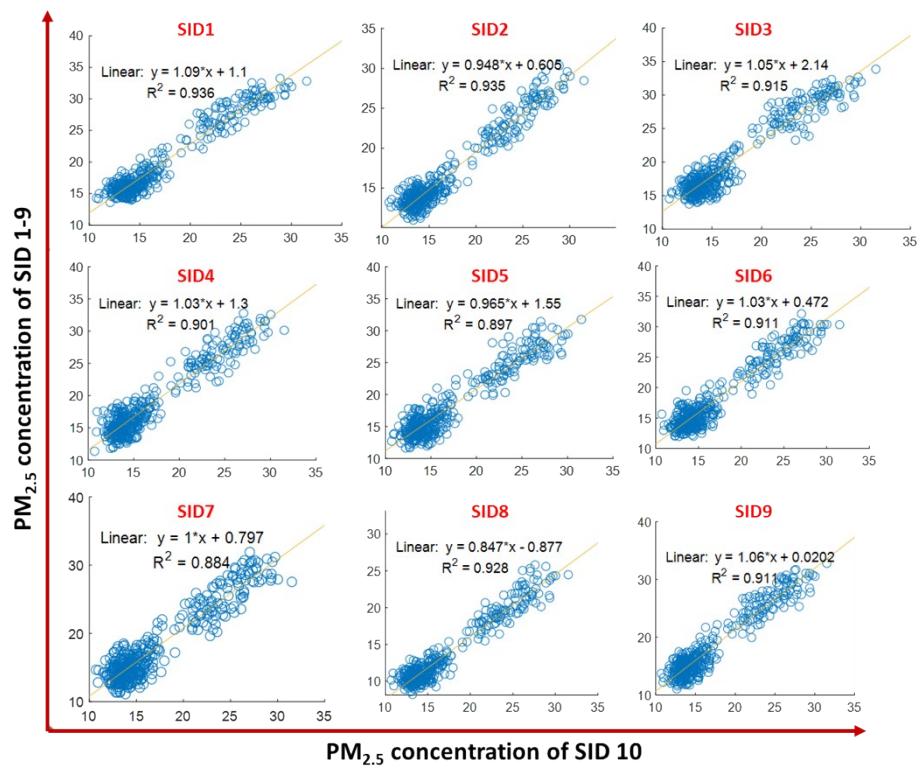

**Figure S5:** Calibration factor obtained for the nine units of LCAQMs (SID1-SID9) against the 10<sup>th</sup> unit (SID10) used as reference sensor from collocation experiments using background PM

### Section S3. Results and Discussion

**Table S3:** Size-resolved average PM concentrations ( $\mu\text{g}/\text{m}^3$ ) for different types of food cooked during the study period

| Food                               | DustTrak 8533   |                   |                 |                  |                   | PMS5003 based LC-AQM |                   |                  |
|------------------------------------|-----------------|-------------------|-----------------|------------------|-------------------|----------------------|-------------------|------------------|
|                                    | PM <sub>1</sub> | PM <sub>2.5</sub> | PM <sub>4</sub> | PM <sub>10</sub> | PM <sub>tot</sub> | PM <sub>1</sub>      | PM <sub>2.5</sub> | PM <sub>10</sub> |
| Vegetable stir-fry                 | 758.4           | 806.6             | 838.3           | 912.4            | 977.0             | 106.2                | 214.2             | 289.1            |
| Utappam (pancakes with vegetables) | 93.8            | 96.3              | 99.2            | 110.0            | 126.4             | 41.04                | 62.2              | 71.8             |
| Chickpea curry                     | 162.1           | 168.0             | 174.7           | 196.9            | 222.6             | 48.21                | 75.1              | 86.3             |
| Idli (steamed rice cake)           | 181.1           | 188.5             | 196.3           | 219.6            | 241.2             | 53.7                 | 88.6              | 105.7            |
| Scrambled eggs and chapati         | 158.3           | 164.0             | 170.4           | 191.2            | 208.7             | 48.9                 | 76.17             | 89.8             |
| Scrambled cheese                   | 210.9           | 216.8             | 222.3           | 240.3            | 260.2             | 59.1                 | 97.0              | 113.5            |
| Beans + shallow fry cheese         | 113.9           | 116.9             | 119.7           | 129.1            | 141.6             | 35.8                 | 54.5              | 64.0             |
| Paratha (Shallow-fried flatbread)  | 263.4           | 271.4             | 275.8           | 282.6            | 294.8             | 161.1                | 322.3             | 393.2            |
| Bhature (Deep fried flatbread)     | 1028.2          | 1033.9            | 1038.0          | 1045.8           | 1059.8            | 162.0                | 307.8             | 327.9            |
| Chips                              | 435.2           | 442.4             | 450.5           | 482.3            | 520.6             | 84.3                 | 149.8             | 165.3            |
| Roasting peanuts                   | 89.4            | 91.1              | 93.4            | 105.0            | 125.7             | 32.0                 | 45.8              | 49.4             |
| Tempered vegetables                | 371.8           | 410.2             | 446.5           | 559.4            | 698.0             | 50.5                 | 99.7              | 147.5            |

Fig. S6 shows the particle number size distribution (PNSD) and particle mass size distribution (PMSD) for two cooked meals ranked top among the foods with the highest average PM concentrations per Table S3. Fig. S6a and S6c show the elevated concentrations of sub-micron particles in the obtained PNSD relative to the background. Figs. S6b and S6d represent corresponding mass distribution plots that show dominance in sub-micron and super-micron regions attributed to cooking-generated aerosols.



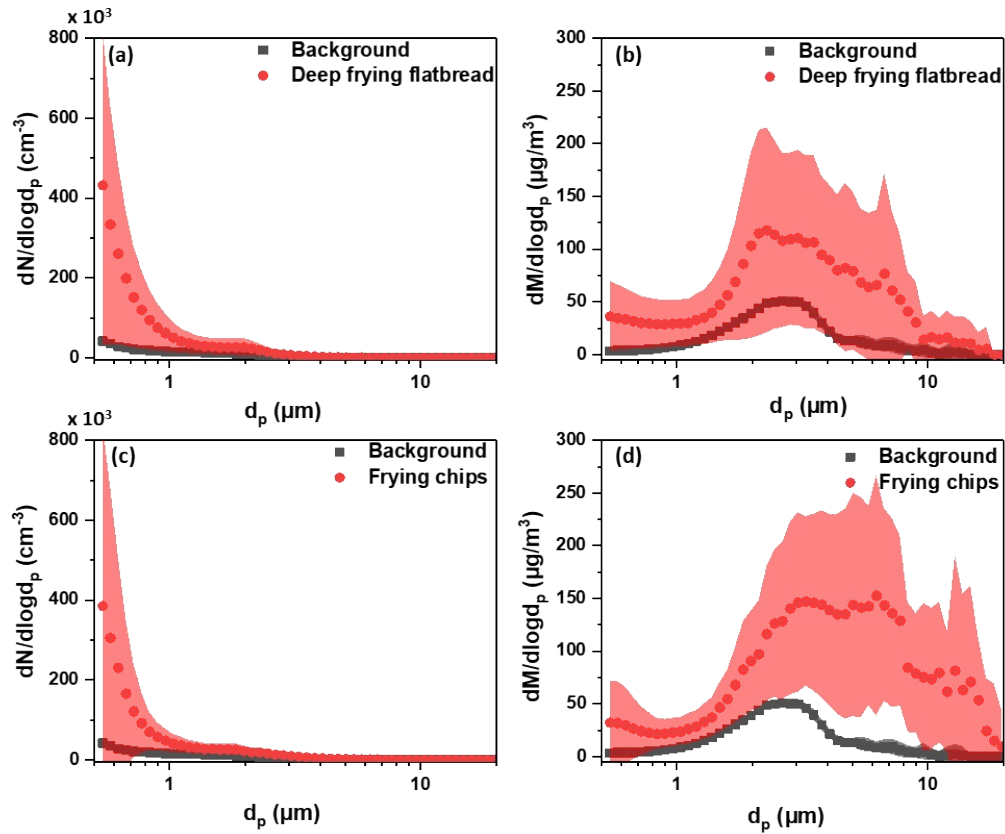

**Figure S6:** The left panel shows the particle number size distribution (PNSD), and the right panel shows the particle mass size distribution (PMSD) corresponding to (a, b) deep frying flatbread, and (c, d) frying chips

Fig. S7 shows the time it took to reach 2x, 3x, 4x, and peak relative to the background concentrations in three different apartment zones when the incense sticks were lit in the worship place instead of the kitchen. During AC operation, pollutants took less time to reach other sections of the house (BR 1, BR 2, and SR) than the ‘w/o AC’ case when compared across all the metrics (2x, 3x, 4x, and peak).

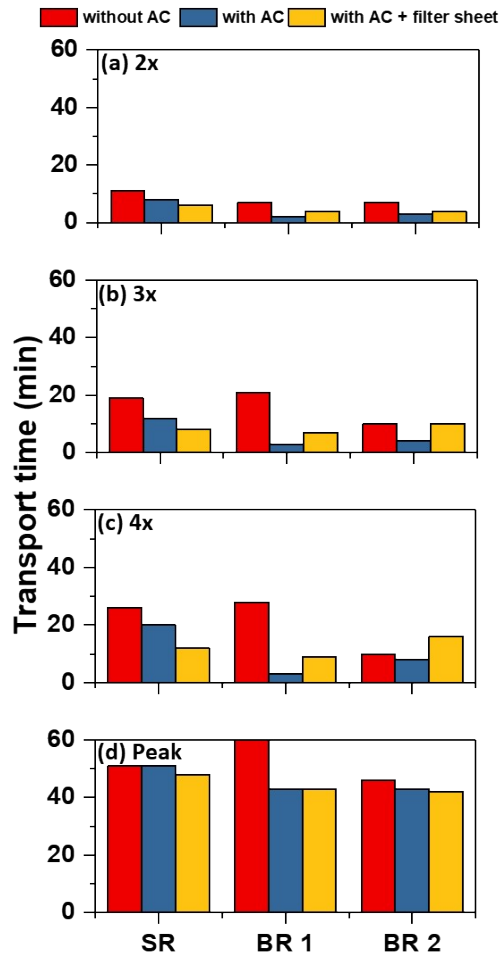

**Figure S7:** Time for the concentrations in the study room (SR), bedroom 1 (BR 1), and bedroom 2 (BR 2) to reach (a) 2x, (b) 3x, (c) 4x, and (d) peak relative to the background concentration under three scenarios: w/o AC, with AC on, and with AC on + filter sheet, when incense was kept in the worship place

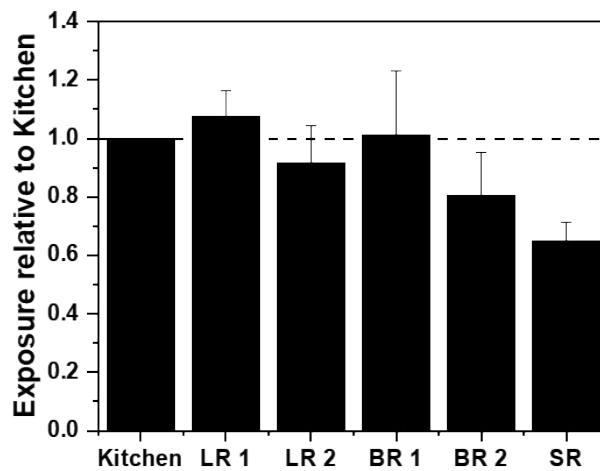

**Figure S8:** Exposure relative to kitchen occurred during incense lighting at two locations in the living room (LR 1 and LR 2), bedroom 1 (BR 1), bedroom 2 (BR 2), and study room (SR)

The average 60 min exposure estimated relative to the kitchen was highest in LR 1 ( $1.08 \pm 0.09$ ), followed by BR 1 ( $1.01 \pm 0.22$ ), LR 2 ( $0.92 \pm 0.13$ ), BR 2 ( $0.81 \pm 0.15$ ), and SR ( $0.65 \pm 0.07$ ).

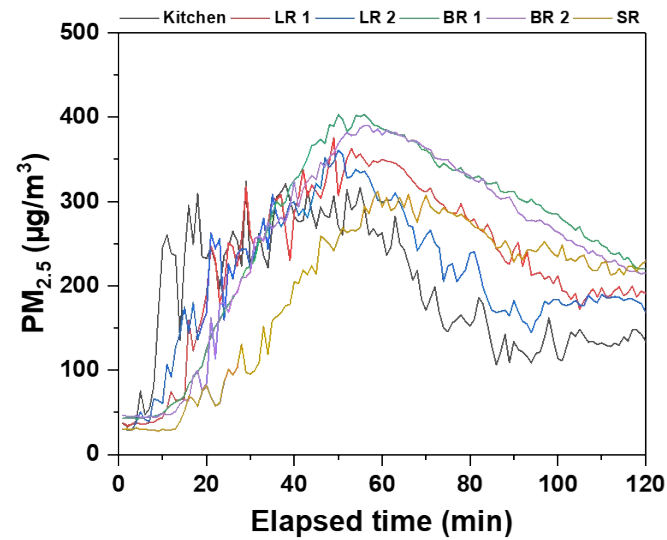

**Figure S9:**  $PM_{2.5}$  concentration evolution over 120 minutes in all the zones of the apartment when no PAC was used

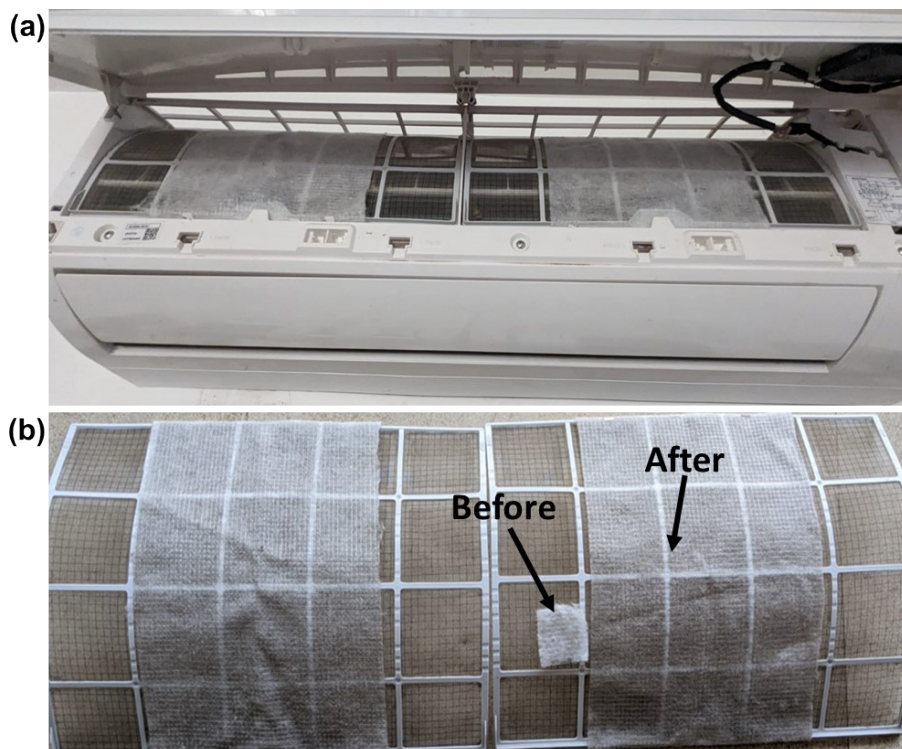

**Figure S10:** (a) AC pre-filters attached with additional filter sheet (b) filter sheet before and after AC operation (Before: small square white patch; After: black filter sheets on both the pre-filters)

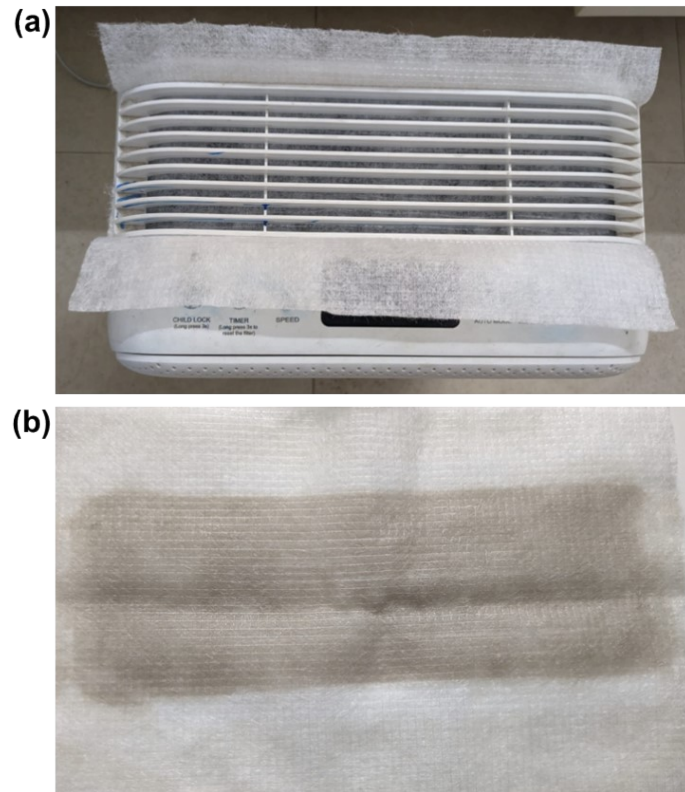

**Figure S11:** (a) PAC with additional filter sheet on top of it and (b) the filter sheet after use showing PM accumulation in the cross-section area that overlapped with the PAC outlet
